# Supplementary material for: Friend leukemia virus integration 1 is a predictor of poor prognosis of breast cancer and promotes metastasis and cancer stem cell properties of breast cancer cells
Source: PubMed Central journal article supplement (PMC6089157; doi:10.1002/cam4.1589), 2018-06-04
Supplement: CAM4-7-3548-s001.pdf [file CAM4-7-3548-s001.pdf]

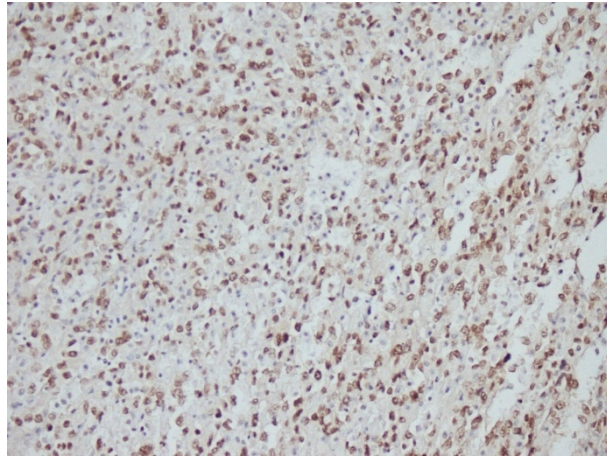

Supplementary Figure E1. FLI-1 was strongly positive in angiosarcoma tissue (Magnification, 200×).

Supplementary Table E1. Primers for real-time quantitative polymerase chain reaction

| Name          | Sequence 5'-3'                     |
|---------------|------------------------------------|
| hFLI-1 F      | CTGTTGTCACACCTCAGTTAC              |
| hFLI-1 R      | CATGTTATTGCCCAAGCTCCTC             |
| FLI-1-pWPXL F | AGCTTTGTTTAAACATGGACGGGACTATTAAGGA |
| FLI-1-pWPXL R | GACTAGTCTAGTAGTAGCTGCCTAAGTGTGAA   |
| hE-cadherin F | GACAACAAGCCCGAATT                  |
| hE-cadherin R | GGAAACTCTCTCGGTCCA                 |
| hN-cadherin F | CGGGTAATCCTCCCAAATCA               |
| hN-cadherin R | CTTATCCCGGCGTTTCATC                |
| hVimentin F   | GAGAACTTTGCCGTTGAAGC               |
| hVimentin R   | GCTTCCTGTAGGTGGCAATC               |
| β-actin-F     | CAGGTCATCACCATTGGCAATGAGC          |

---

β-actin-R

CGGATGTCCACGTCCACTTCATGA

---
